# Supplementary material for: Acquisition and dissemination of cephalosporin-resistant E. coli in migratory birds sampled at an Alaska landfill as inferred through genomic analysis
Source: PubMed Central journal article supplement (PMC5943298; doi:10.1038/s41598-018-25474-w), 2018-05-09
Supplement: 41598_2018_25474_MOESM1_ESM.pdf [file 41598_2018_25474_MOESM1_ESM.pdf]

## Supplementary material

### Acquisition and dissemination of cephalosporin-resistant *E. coli* in migratory birds sampled at an Alaska landfill as inferred through genomic analysis

Christina A. Ahlstrom<sup>a\*</sup>, Jonas Bonnedahl<sup>b,c</sup>, Hanna Woksepp<sup>d</sup>, Jorge Hernandez<sup>e</sup>, Björn Olsen<sup>f,g</sup>, Andrew M. Ramey<sup>a\*</sup>

<sup>a</sup>U.S. Geological Survey, Alaska Science Center, Anchorage, Alaska, 99508, USA

<sup>b</sup>Centre for Ecology and Evolution in Microbial Model Systems, Linnaeus University, SE - 39182, Sweden

<sup>c</sup>Department of Infectious Diseases, Kalmar County Hospital, Kalmar, SE-39185, Sweden

<sup>d</sup>Department of Clinical Microbiology, Kalmar County Hospital, Kalmar, SE-39185, Sweden

<sup>e</sup>Department of Microbiology, Kalmar County Hospital, Kalmar, SE-39185, Sweden

<sup>f</sup>Zoonosis Science Center, Department of Medical Biochemistry and Microbiology, Uppsala University, Uppsala, SE-75185, Sweden

<sup>g</sup>Section for Infectious Diseases, Department of Medical Sciences, Uppsala University, Uppsala, SE-75185, Sweden

\*Address correspondence to Christina A. Ahlstrom, [cahlstrom@usgs.gov](mailto:cahlstrom@usgs.gov) or Andrew M. Ramey, [aramey@usgs.gov](mailto:aramey@usgs.gov).

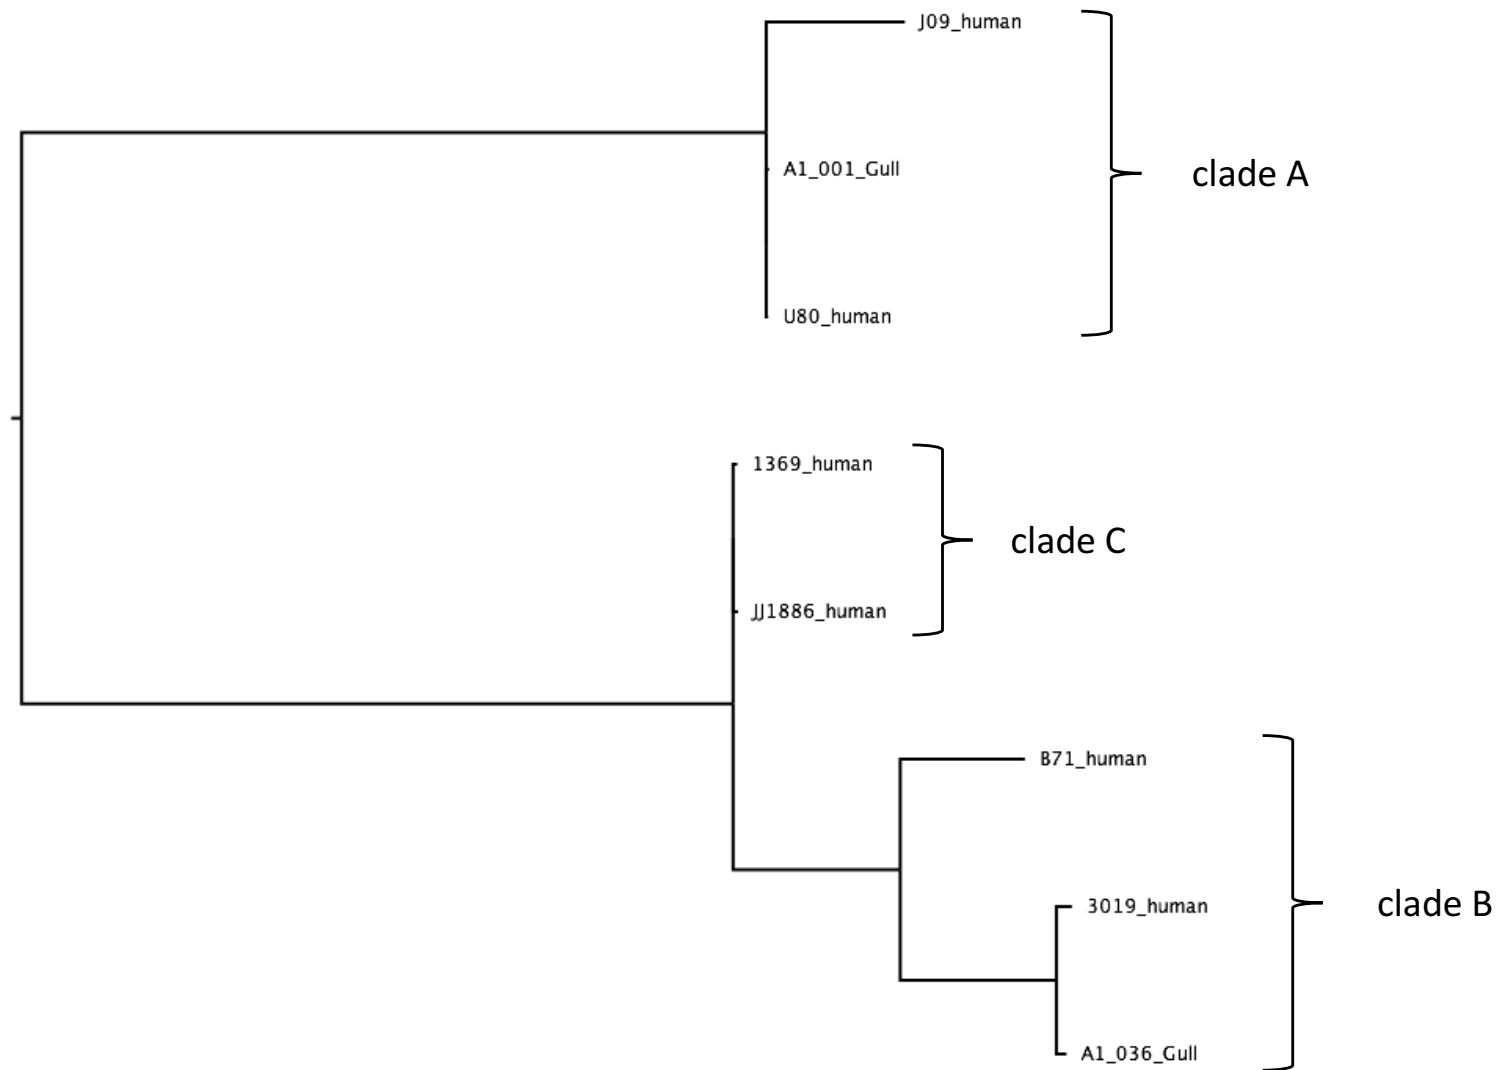

**Fig. S1** Midpoint rooted clonal core genome phylogeny of ST131 *E. coli* isolates isolated from large-bodied gulls in this study and human clinical samples previously reported representing the three ST131 clades (McNalley et al., 2016).

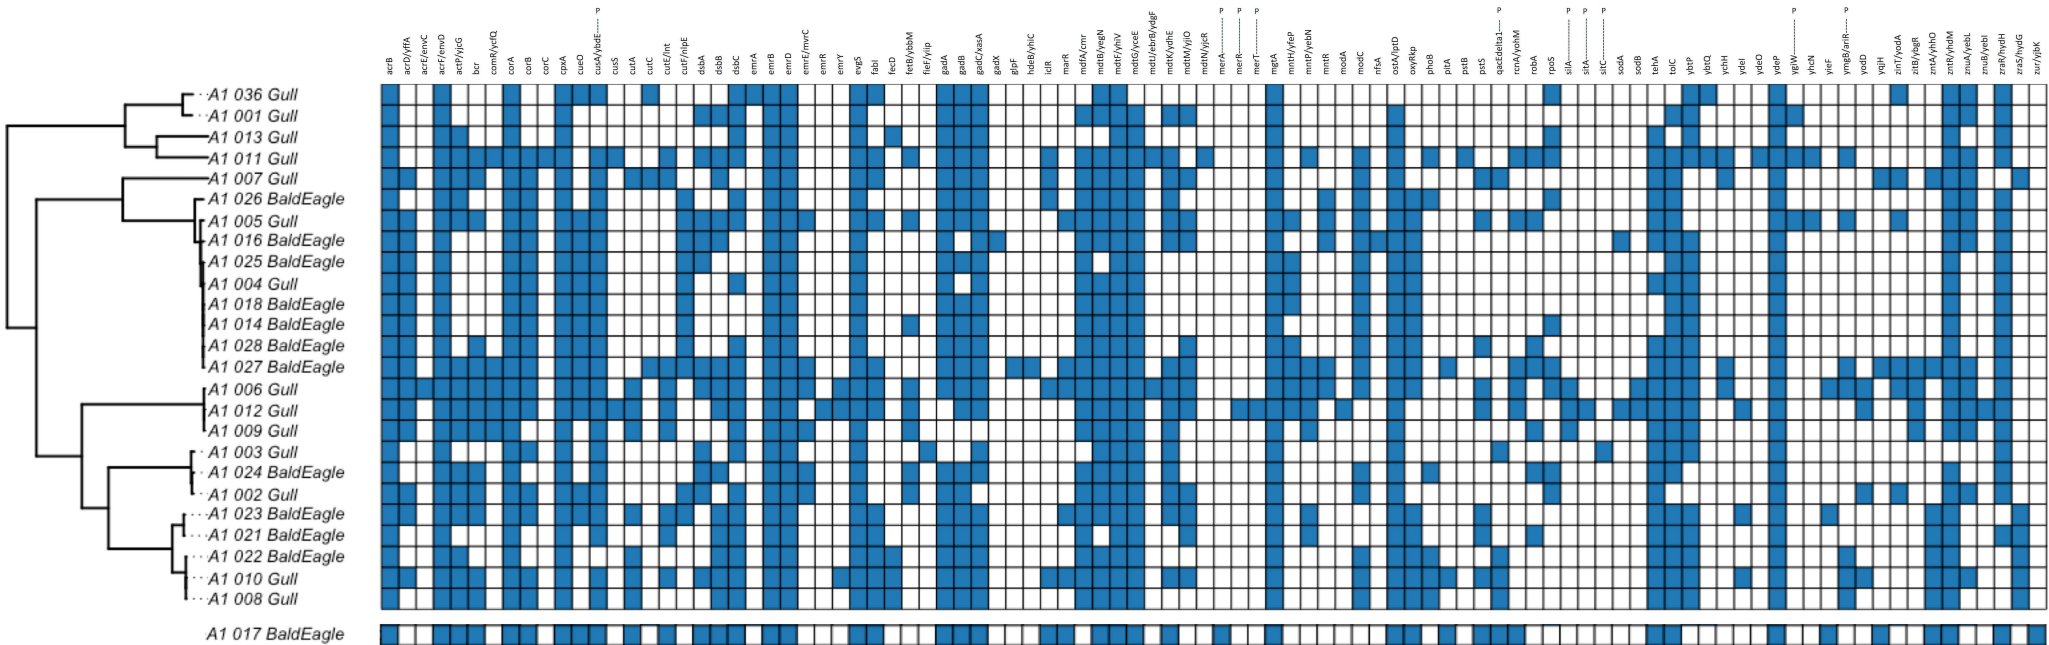

**Fig. S2** Midpoint rooted clonal core genome phylogeny of 25 ESBL-producing *E. coli* isolates originating from large-bodied gulls and bald eagles in Alaska. Presence of each of 96 BacMet-identified biocide/heavy metal resistance genes is shown as a matrix, with colored squares indicating presence and white indicating that the gene was not found. The divergent A1\_017\_BaldEagle isolate is included at the bottom of the matrix. The letter “P” above the gene names indicates the gene has previously been found to be plasmid-borne.

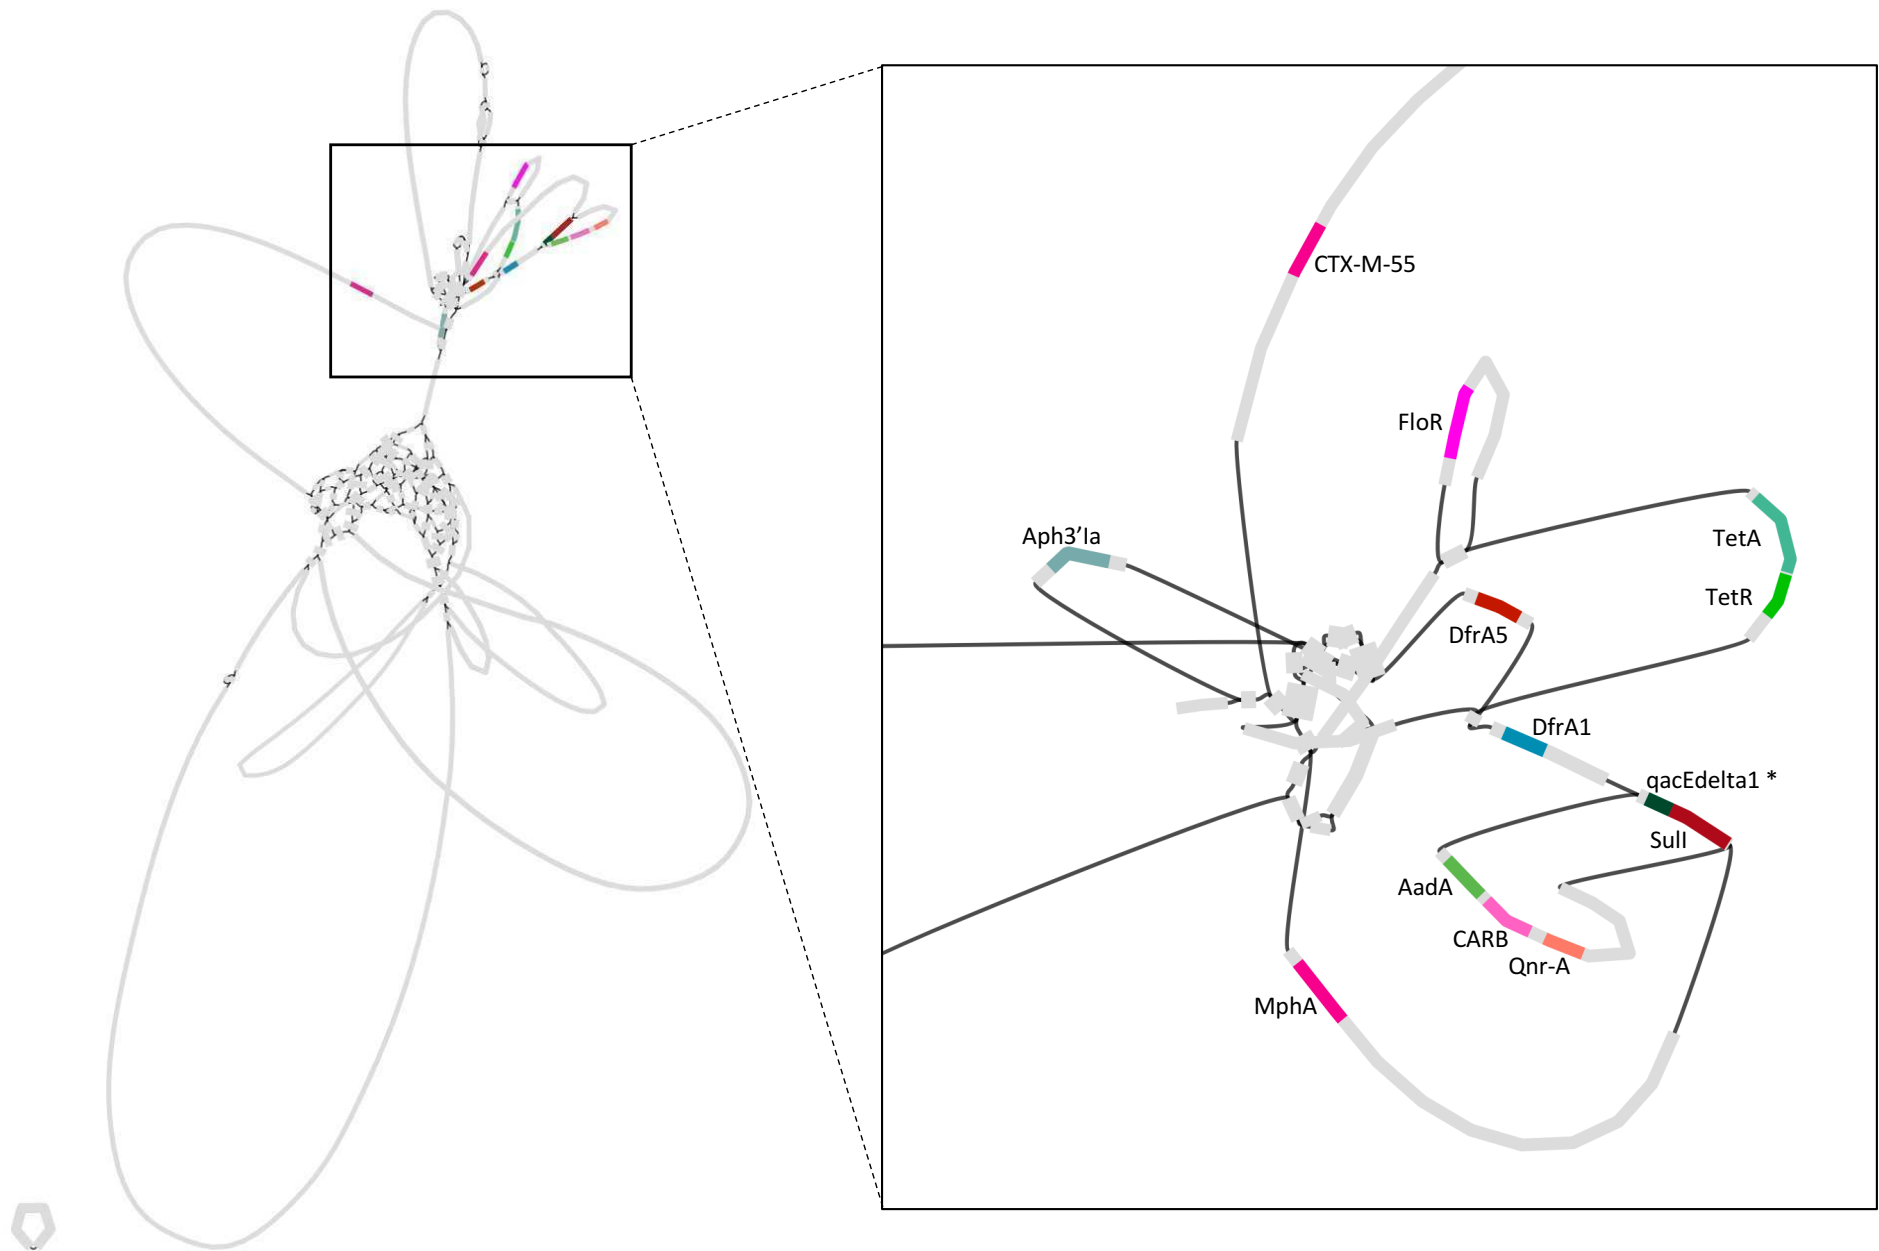

**Fig. S3** Isolate A1\_007\_Gull putative plasmid contigs (grey rectangles) assembled by PlasmidSPAdes and visualized with Bandage. Likely connections between contigs are shown by black lines. The locations of AMR genes and biocide/heavy metal resistance genes are indicated by colored rectangles, labeled with the gene name. Biocide/heavy metal resistance genes are indicated by an asterisk (\*).

Supplementary Table 1 Phenotypic resistance profiles to 18 antibiotic discs of ESBL-producing *E. coli* isolates originating from large-bodied gull and bald eagle fecal samples in Alaska.

| Isolate ID       | NAL | NIT100 | PTZ36 | TET | TR15 | TSU25 | MER10 | CIP5 | AMP10 | CDR30 | KLO | GEN10 | MEC10 | AMC | FEP | FOX | CFZ | CTX |
|------------------|-----|--------|-------|-----|------|-------|-------|------|-------|-------|-----|-------|-------|-----|-----|-----|-----|-----|
| A1_001_Gull      | S   | S      | S     | S   | S    | S     | S     | S    | R     | R     | S   | S     | S     | R   | R   | R   | S   | R   |
| A1_002_Gull      | S   | S      | S     | S   | S    | S     | S     | S    | R     | R     | S   | S     | S     | S   | R   | S   | S   | R   |
| A1_003_Gull      | S   | S      | S     | R   | S    | S     | S     | S    | R     | R     | S   | S     | S     | R   | S   | R   | R   | S   |
| A1_004_Gull      | S   | S      | R     | S   | S    | S     | S     | S    | R     | R     | S   | S     | S     | R   | S   | R   | R   | S   |
| A1_005_Gull      | S   | S      | I     | S   | S    | S     | S     | S    | R     | R     | S   | S     | S     | R   | S   | R   | R   | S   |
| A1_006_Gull      | S   | S      | S     | R   | S    | S     | S     | S    | R     | R     | S   | S     | S     | R   | S   | R   | S   | S   |
| A1_007_Gull      | R   | R      | S     | R   | R    | S     | S     | R    | R     | R     | R   | S     | S     | R   | R   | R   | R   | R   |
| A1_008_Gull      | S   | S      | S     | S   | R    | R     | S     | S    | R     | R     | S   | S     | S     | R   | S   | R   | R   | S   |
| A1_009_Gull      | S   | S      | I     | R   | S    | S     | S     | S    | R     | R     | S   | S     | S     | R   | S   | R   | S   | S   |
| A1_010_Gull      | S   | S      | S     | S   | R    | R     | S     | S    | R     | R     | S   | S     | S     | R   | S   | R   | R   | S   |
| A1_011_Gull      | S   | S      | I     | S   | S    | S     | S     | S    | R     | R     | S   | S     | S     | R   | S   | R   | R   | R   |
| A1_012_Gull      | S   | S      | S     | R   | S    | S     | S     | S    | R     | R     | S   | S     | S     | R   | S   | R   | S   | S   |
| A1_013_Gull      | S   | S      | S     | S   | S    | S     | S     | S    | R     | R     | S   | S     | S     | R   | S   | R   | S   | S   |
| A1_014_BaldEagle | S   | S      | R     | S   | S    | S     | S     | S    | R     | R     | S   | S     | S     | R   | S   | R   | I   | S   |
| A1_016_BaldEagle | S   | S      | I     | R   | S    | S     | S     | S    | R     | R     | S   | S     | S     | R   | S   | R   | R   | R   |
| A1_017_BaldEagle | S   | S      | S     | R   | S    | S     | S     | S    | R     | R     | S   | S     | S     | R   | S   | R   | R   | R   |
| A1_018_BaldEagle | S   | S      | R     | S   | S    | S     | S     | S    | R     | R     | S   | S     | S     | R   | S   | R   | I   | S   |
| A1_021_BaldEagle | S   | S      | S     | R   | S    | S     | S     | S    | R     | R     | S   | S     | S     | R   | S   | R   | R   | R   |
| A1_022_BaldEagle | S   | S      | R     | S   | S    | I     | S     | S    | R     | R     | S   | S     | S     | R   | S   | R   | R   | R   |
| A1_023_BaldEagle | S   | S      | I     | S   | R    | R     | S     | S    | R     | R     | S   | S     | S     | R   | S   | R   | R   | S   |
| A1_024_BaldEagle | S   | S      | S     | S   | S    | S     | S     | S    | R     | R     | S   | S     | S     | R   | S   | R   | R   | R   |
| A1_025_BaldEagle | S   | S      | S     | S   | S    | S     | S     | S    | R     | R     | S   | S     | S     | R   | S   | R   | R   | S   |
| A1_026_BaldEagle | S   | S      | R     | S   | S    | S     | S     | S    | R     | R     | S   | S     | S     | R   | S   | R   | I   | S   |
| A1_027_BaldEagle | S   | S      | I     | S   | S    | S     | S     | S    | R     | R     | S   | S     | S     | R   | S   | R   | S   | S   |
| A1_028_BaldEagle | S   | S      | R     | S   | S    | S     | S     | S    | R     | R     | S   | S     | S     | R   | S   | R   | I   | S   |
| A1_036_Gull      | S   | S      | R     | S   | S    | S     | S     | S    | R     | R     | S   | S     | S     | R   | S   | R   | R   | S   |

S = Susceptible, I = Intermediate, R = Resistant

NAL = nalidixic acid, NIT100 = nitrofurantoin, PTZ36 = piperacillin-tazobactam, TET = tetracycline, TR15 = trimethoprim, TSU25 = trimethoprim-sulfamethoxazole, MER10 = meropenem, CIP5 = ciprofloxacin, AMP10 = ampicillin, CDR30 = cefadroxil, KLO = chloramphenicol, GEN10 = gentamicin, MEC10 = mecillinam, AMC = Amoxicillin/clavulanic acid, FEP = Cefepime, FOX = Ceftaxime, CFZ = Ceftazidime, CTX = Cefotaxime

**Supplementary Table 2** WGS *de novo* assembly metrics of 27 ESBL-producing *E. coli* isolates originating from large bodied gull and bald eagle fecal samples in Alaska.

| <b>Isolate ID</b> | <b>mean # contigs &gt;500bp</b> |
|-------------------|---------------------------------|
| A1_001_Gull       | 104                             |
| A1_002_Gull       | 81                              |
| A1_003_Gull       | 84                              |
| A1_004_Gull       | 82                              |
| A1_005_Gull       | 179                             |
| A1_006_Gull       | 206                             |
| A1_007_Gull       | 108                             |
| A1_008_Gull       | 146                             |
| A1_009_Gull       | 90                              |
| A1_010_Gull       | 241                             |
| A1_011_Gull       | 170                             |
| A1_012_Gull       | 372                             |
| A1_013_Gull       | 89                              |
| A1_014_BaldEagle  | 74                              |
| A1_016_BaldEagle  | 120                             |
| A1_017_BaldEagle  | 107                             |
| A1_018_BaldEagle  | 100                             |
| A1_020_BaldEagle  | 931                             |
| A1_021_BaldEagle  | 139                             |
| A1_022_BaldEagle  | 263                             |
| A1_023_BaldEagle  | 231                             |
| A1_024_BaldEagle  | 212                             |
| A1_025_BaldEagle  | 92                              |
| A1_026_BaldEagle  | 160                             |
| A1_027_BaldEagle  | 256                             |
| A1_028_BaldEagle  | 122                             |
| A1_036_Gull       | 52                              |

## File S1: Command line arguments for programs used

Arguments:

\$1= prefix for each isolate ID

\$2= path to SPAdes-assembled contigs

### # ConDeTri

```
perl condetri.pl -fastq1=$1_R1.fastq -fastq2=$1_R2.fastq -prefix=$1 -sc=33
```

```
perl filterPCRDupl.pl -fastq1=$1_trim1.fastq -fastq2=$1_trim2.fastq -prefix=$1
```

### # SPAdes

```
python spades.py -k 21,33,55,77,99,127 --cov-cutoff 'auto' --careful -1 $1_uniq1.fastq -2 $1_uniq2.fastq
```

### # PlasmidSPAdes

```
python spades.py -k 21,33,55,77,99,127 --cov-cutoff 'auto' --plasmid --careful -1 $1_uniq1.fastq -2 $1_uniq2.fastq
```

### # Parsnp

```
parsnp -r ! -d $2 -c
```

### # ClonalFrameML

```
./ClonalFrameML "path to parsnp nwk tree file" "path to parsnp xmfa file" -xmfa_file true
```

### # *in silico* phylotyping (Kaas et al., 2012)

```
perl Ks_phylotyper.pl -t Phylotyping_products.txt -r rules_table.txt -l results.txt $2
```

### # SRST2 MLST typing

```
python srst2.py --input_pe $1_uniq1.fastq $1_uniq2.fastq --log --mlst_db Escherichia_coli1.fasta --mlst_definitions ecoli.txt --forward _uniq1 --reverse _uniq2
```

### # SRST2 AMR gene detection

```
python srst2.py --input_pe $1_uniq1.fastq $1_uniq2.fastq --log --gene_db srst2/data/ARGannot.r1.fasta --forward _uniq1 --reverse _uniq2 --report_all_consensus
```

```
python srst2.py --prev_output "path to srst2 AMR gene detection results" --output compiled_AMR_results
```

```
python consensus_alignment.py --in "path to srst2 AMR gene detection results" *.all_consensus_alleles.fasta --type gene
```

### # BacMet biocide/heavy metal resistance gene detection

```
perl BacMet-Scan.pl -i $2 -d BacMet_EXP.704
```

### # Seqpoet *in silico* PCR

```
seqpoet --pcr --out $1_insilicoPCR_results.fasta $2.fasta primers.txt
```

### # LS-BSR

```
python ls_bsr.py -d $2 -c usearch
```

```
python filter_BSR_variome.py --bsr_matrix= bsr_matrix.txt
```
